# Supplementary material
Source: PubMed Central journal article supplement (PMC5094325)

ATH 01

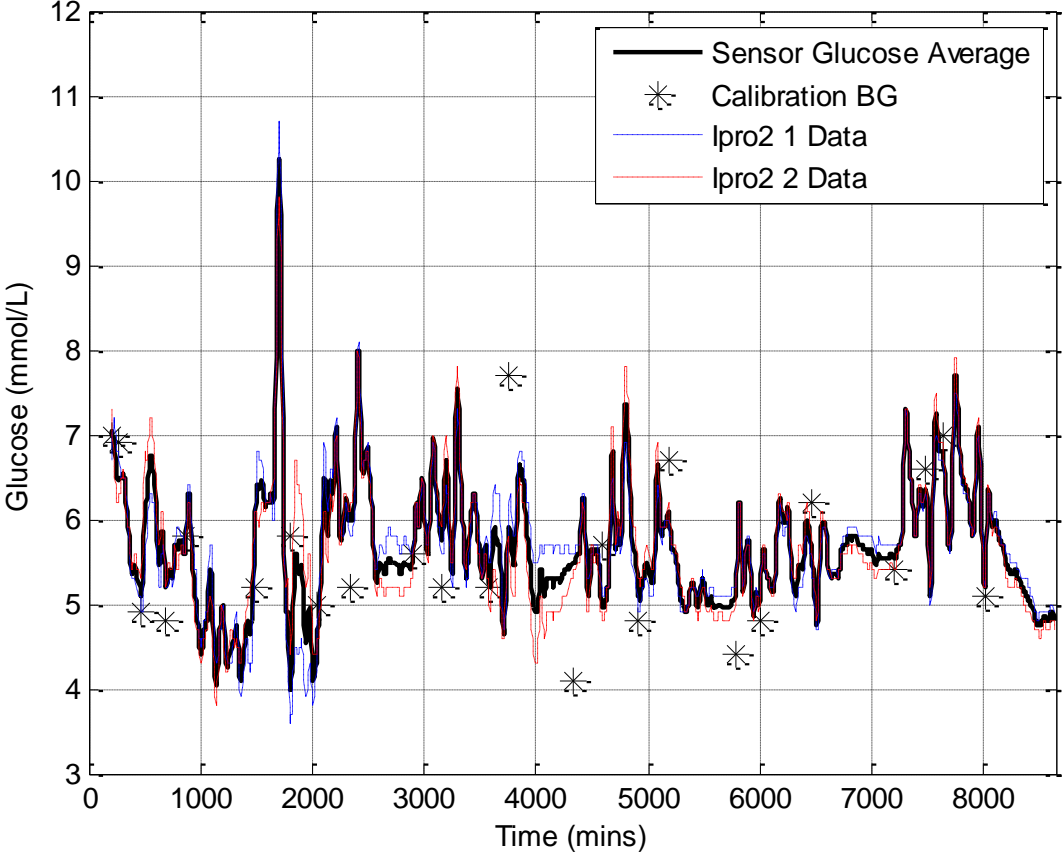

ATH 02

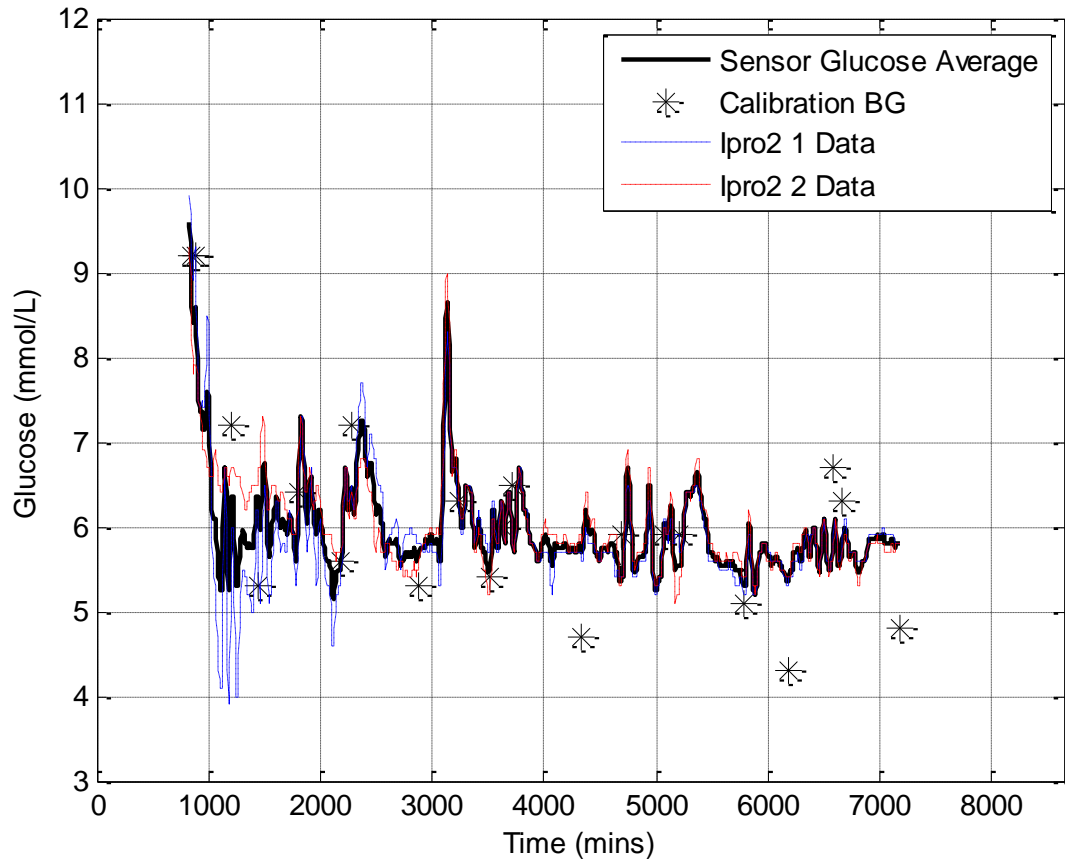

ATH 03

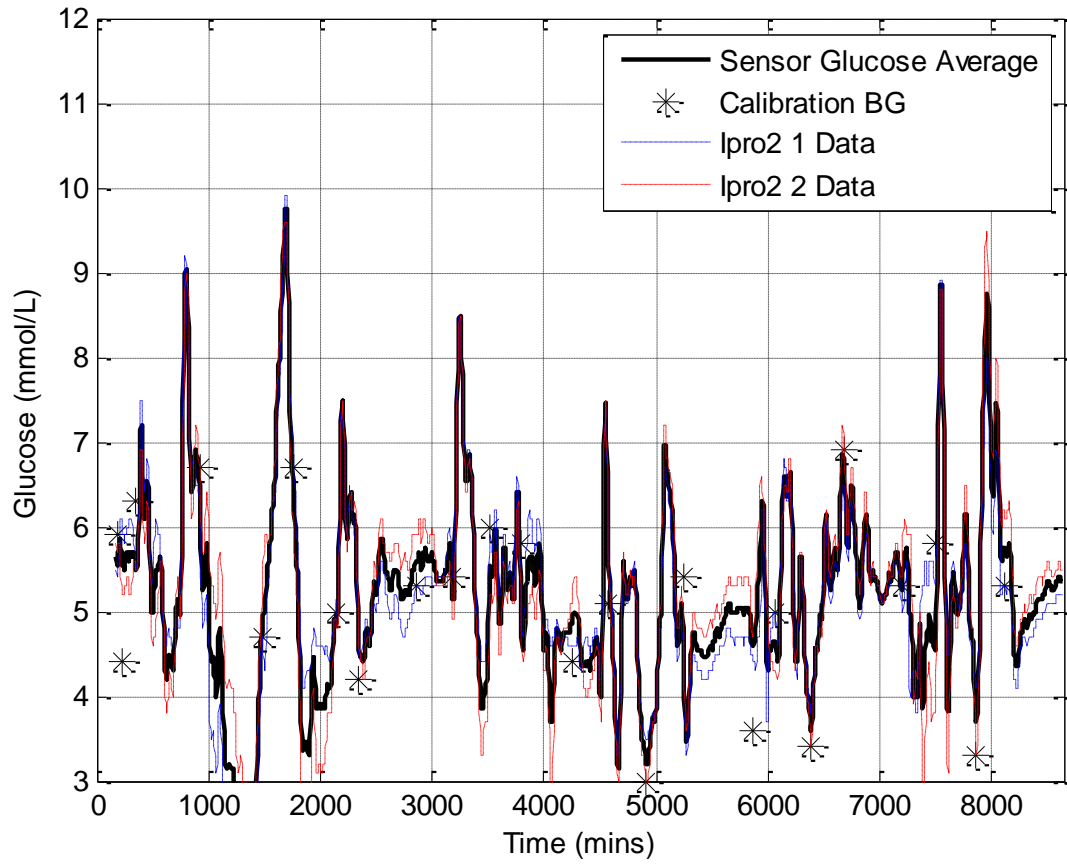

ATH 04

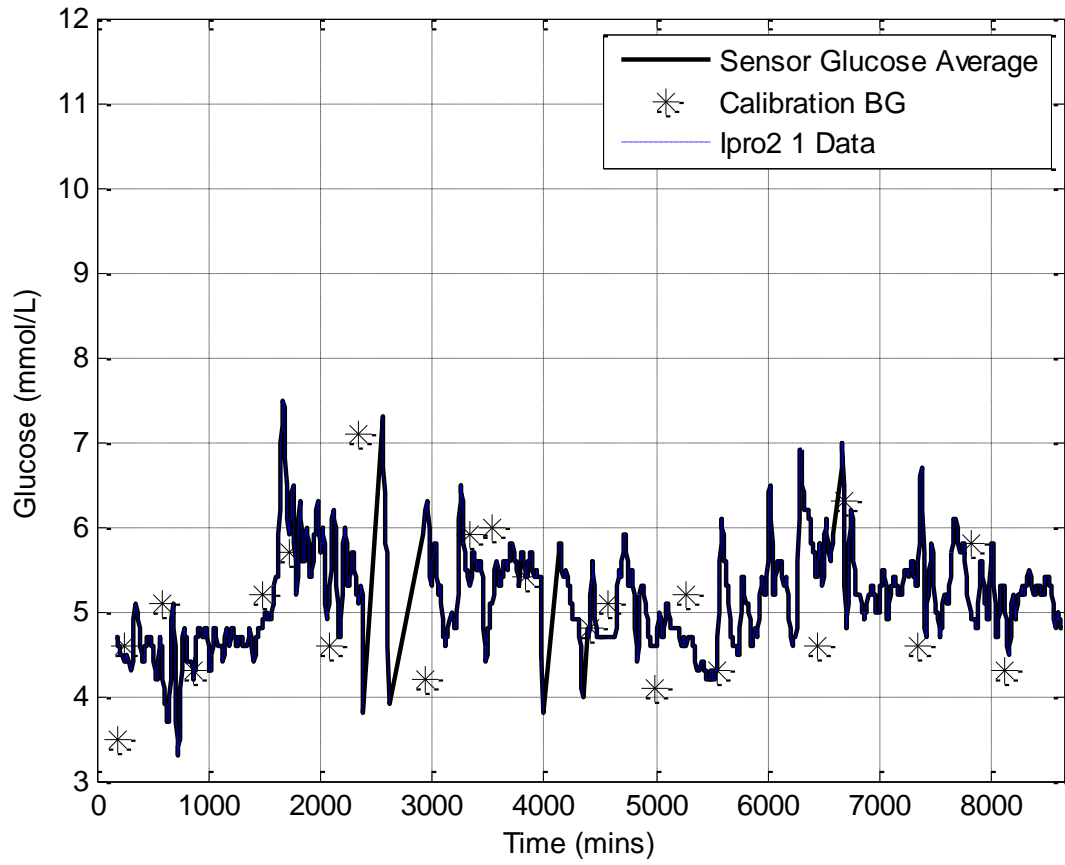

ATH 05

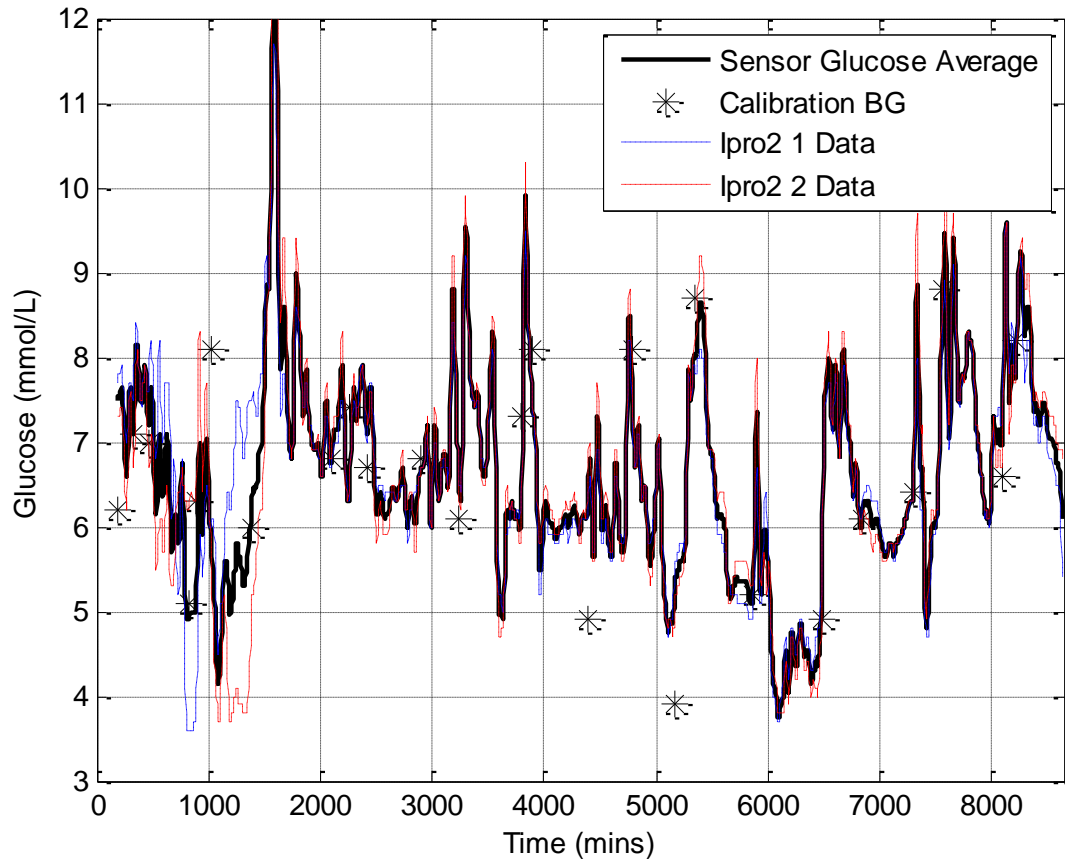

ATH 06

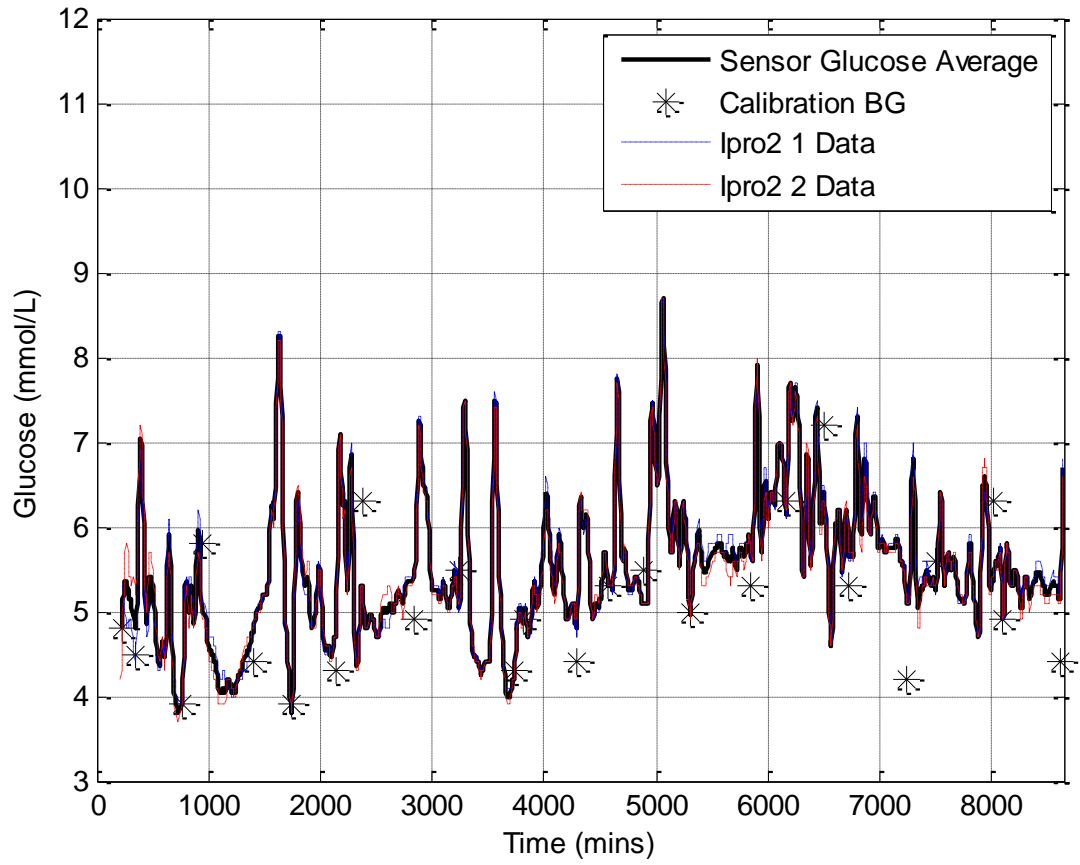

ATH 07

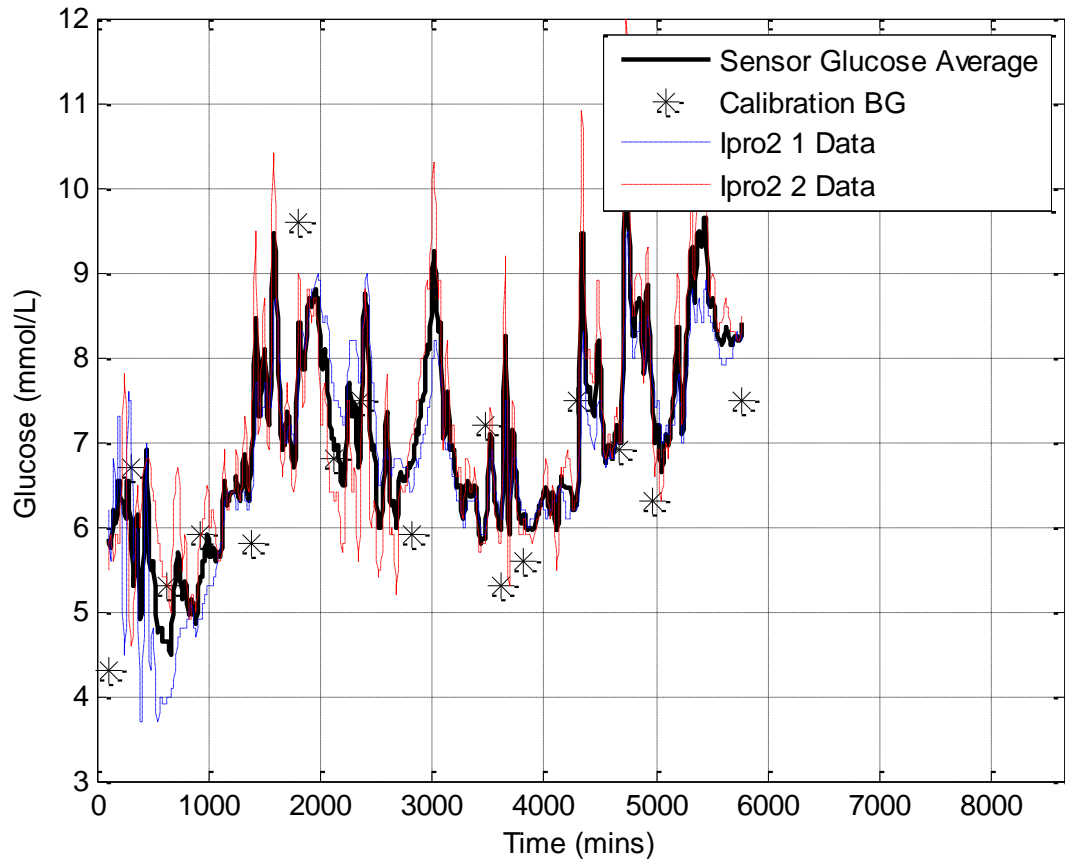

ATH 08

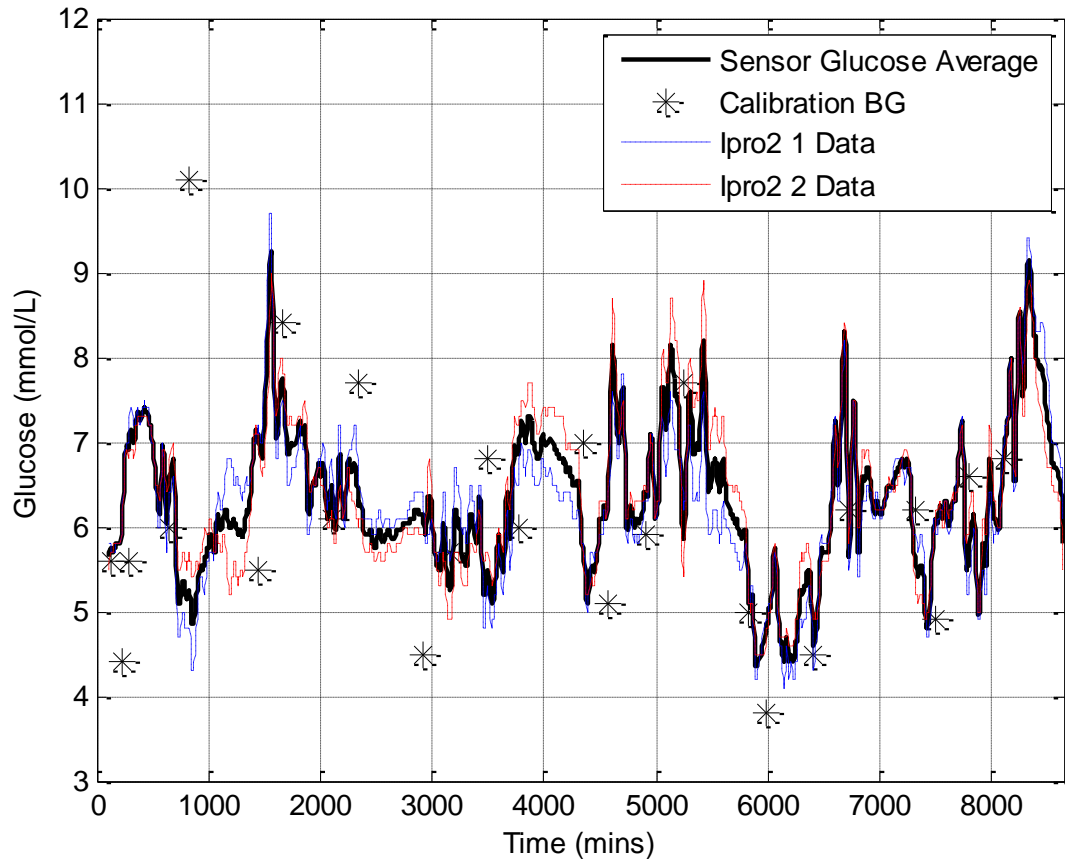



ATH 09

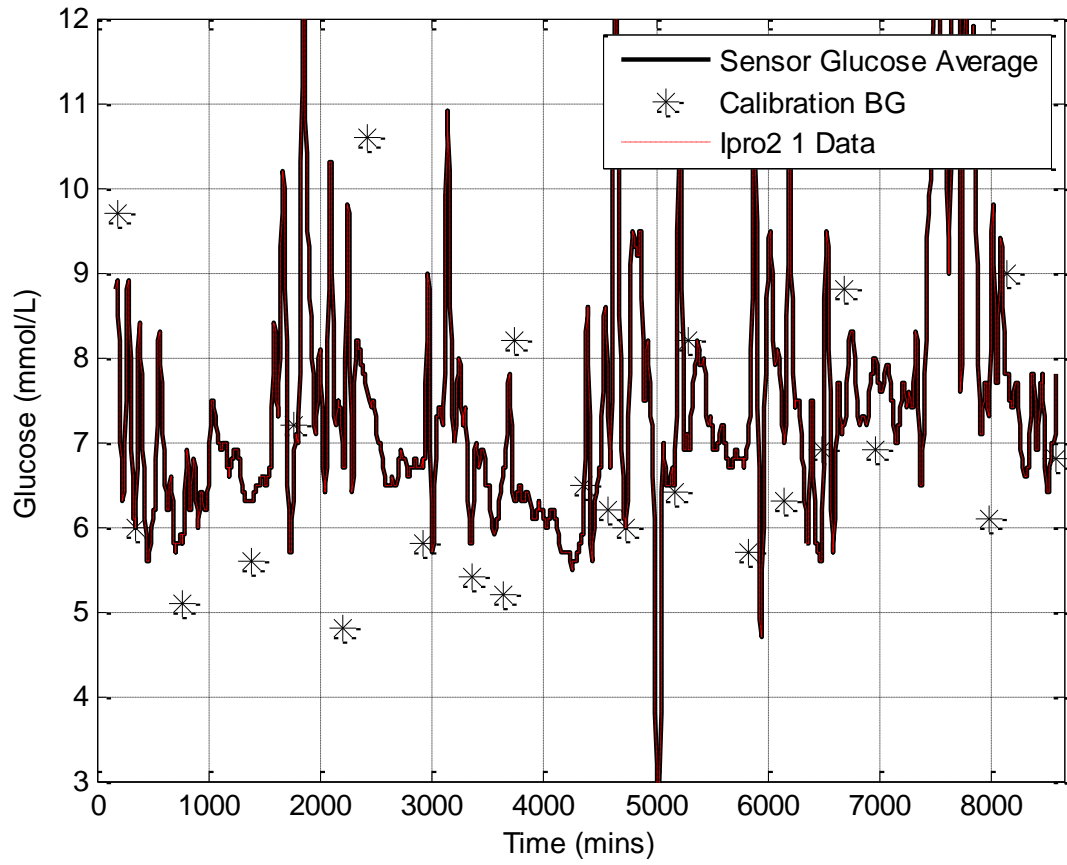

ATH 10

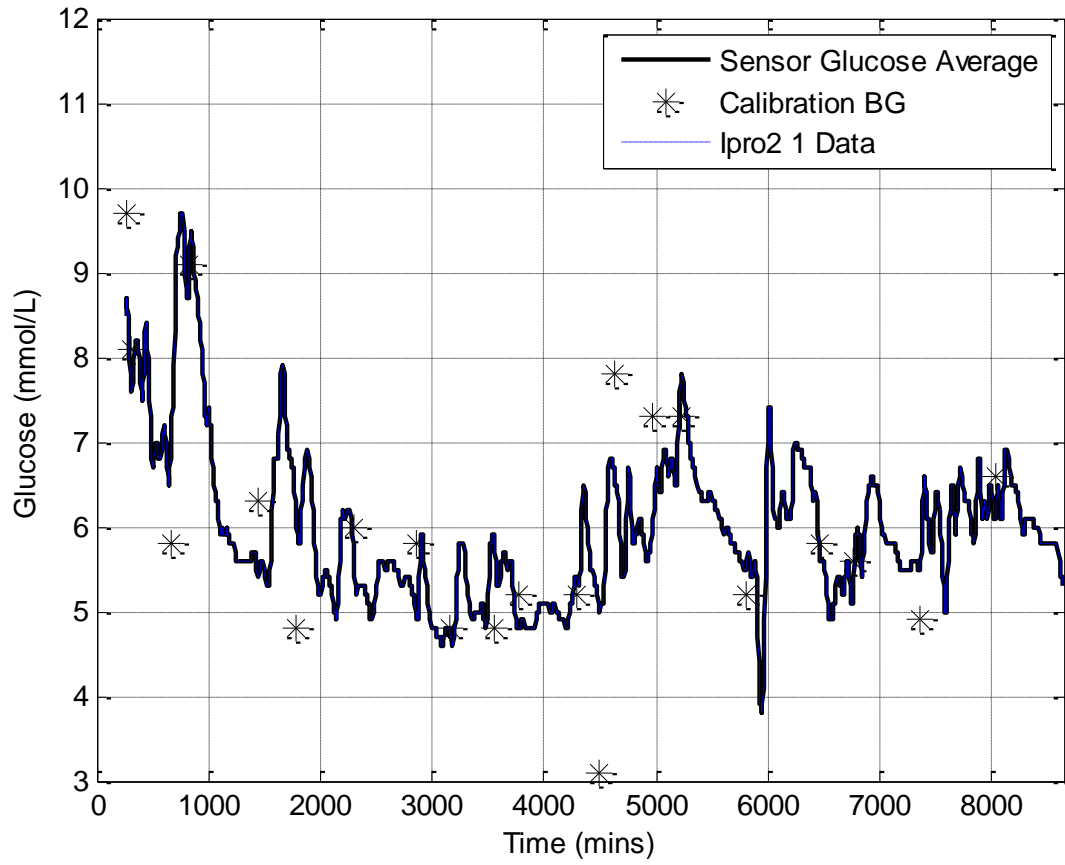

Supplement: 344.pdf [file 344.pdf]
